# Supplementary material
Source: publisher site journal article supplement (https://www.degruyter.com/publication/journal_key/GEO/downloadAsset/GEO_CFP%20APGI%202021.pdf)
Supplement: Supplementary file 1 [file GEO_CFP%20APGI%202021.pdf]

## Call for papers – Special Issue CURRENT TRENDS IN DEVELOPMENT OF ENGINEERING SURVEYING METHODS

### GUEST EDITORS

---

Dr. hab. Eng. Janina Zaczek-Peplinska, Dr. Eng. Krzysztof Karsznia,  
and Dr. Eng. Waldemar Odziemczyk

### DESCRIPTION

---

The XV Scientific and Technical Conference from the cycle *Current Issues in Engineering Geodesy* entitled “Current Trends in Development of Engineering Surveying Methods” will be held on May 27-28, 2021 online. The conference is aimed to present current achievements in the area of engineering geodesy with invited guests from abroad, so as to enable participants to share opinions and experiences from various scientific research centers and commercial companies. It is hoped that participants will have an opportunity to discuss the direction of development in engineering geodesy in relation to global trends. We also anticipate discussion forum on technical standards in engineering geodesy as well as law regulations dealing with engineering measurements.

In this special issue, we invite front-line researchers and authors to submit original research and review articles focused on engineering geodesy, as well as specialists from other related disciplines such as structural engineering, geotechnics, water construction, machine construction and mining.

Potential topics include, but are not limited to:

- (a) Satellite Techniques in geodetic engineering measurements,
- (b) Instruments and measurement techniques,
- (c) Monitoring of the constructions under static or dynamic load,
- (d) Engineering measurements in geotechnics, geodynamics, underground construction and mining,
- (e) Teleinformatics in engineering geodesy,
- (f) Laser scanning in engineering geodesy,
- (g) BIM - modelling and data management of the engineering objects,
- (h) Theoretical aspects of geodetic engineering measurements,
- (i) Engineering geodesy in monitoring dangers of the engineering constructions,

All participants presenting original researches or reviews are welcome to publish their works in the Special Issue of *Open Geosciences*.

### HOW TO SUBMIT

---

All manuscripts (research and review papers) should be submitted online at <https://www.editorialmanager.com/opengeo/>. The submitted manuscripts should meet the requirements provided in [Instruction for Authors](#). Authors are encouraged to use the Open Geosciences [Manuscript Template](#).

The online paper processing system provides a track dedicated to this Special Issue – please make sure that the option “Engineering geodesy” is selected when you submit your manuscript. *Open Geosciences* ensures that all submitted papers will be considered by the editor and will go through a peer-review process as any other paper. Accepted articles will be indexed, abstracted and published.

The deadline for submission is November 30, 2021. Once a paper is accepted for publication, authors will be asked to cover Article Processing Charges (500 EUR).

In case of questions or further detailed information please contact Managing Editor – Dr. Jan Barabach ([jan.barabach@degruyter.com](mailto:jan.barabach@degruyter.com)).

- Authors publishing in *Open Geosciences* enjoy the following benefits:
- IMPACT FACTOR (2019) - 0.985
- no submission charges
- fast, comprehensive and transparent peer-review
- free language assistance for authors from non-English speaking regions
- immediate publication upon completing the publishing process
- comprehensive abstracting and indexing – JCR and SCIE, SCOPUS
- extensive promotion and worldwide distribution of each published article
